# Supplementary material for: Combined risk modelling approach to identify the optimal carotid revascularisation approach
Source: HighWire-hosted journal article supplement (doi:10.1136/svn-2020-000558), 2021-03-08

**Supplemental Figure 1:** Kaplan Meier curves displaying the risk of stroke or death (y-axis) in CREST after excluding strokes that occur in the perioperative period.

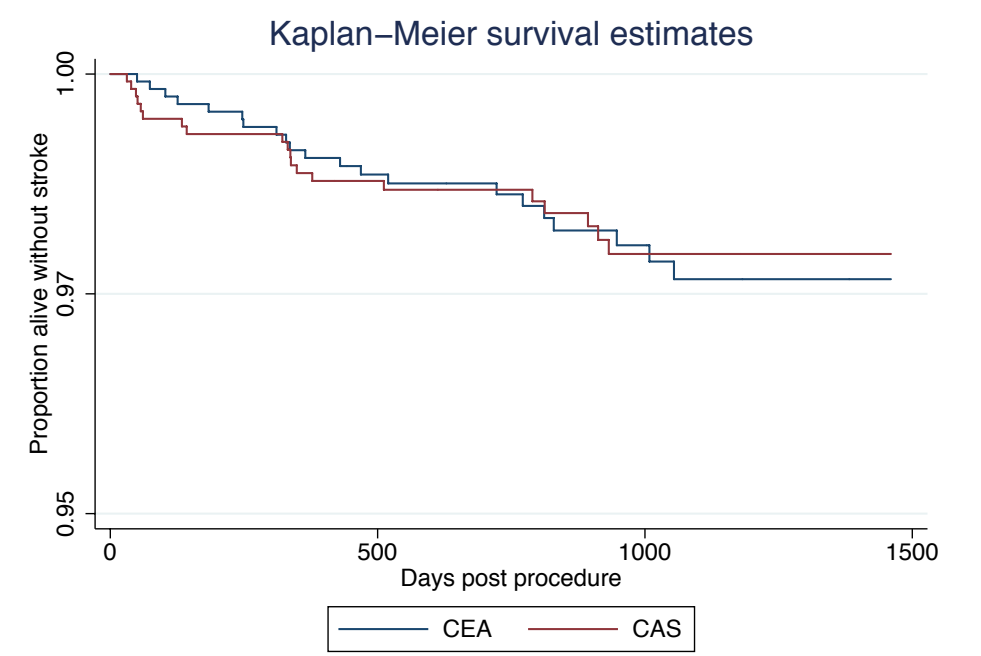

**Supplemental Figure 2**

Calibration of stroke (panel A) and MI (panel B) treatment models. Blue bars represent actual proportion in each risk quintile with perioperative stroke/death (panel A) or MI (panel B), red bars represent proportion of population with predicted perioperative stroke/death (panel A) or MI (panel B) in each quintile.

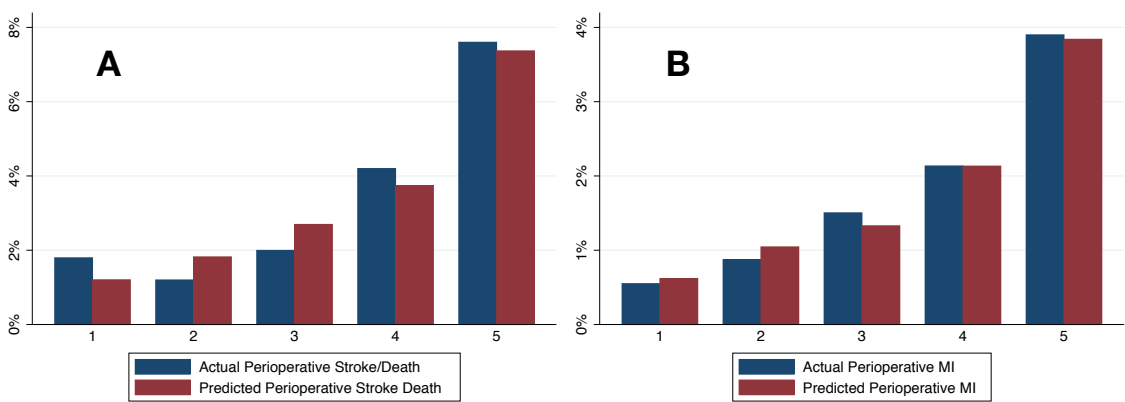

**Supplemental Figure 3:** Distribution of baseline stroke risk (x-axis) vs. MI risk (y-axis).

Correlation coefficient – 0.28.

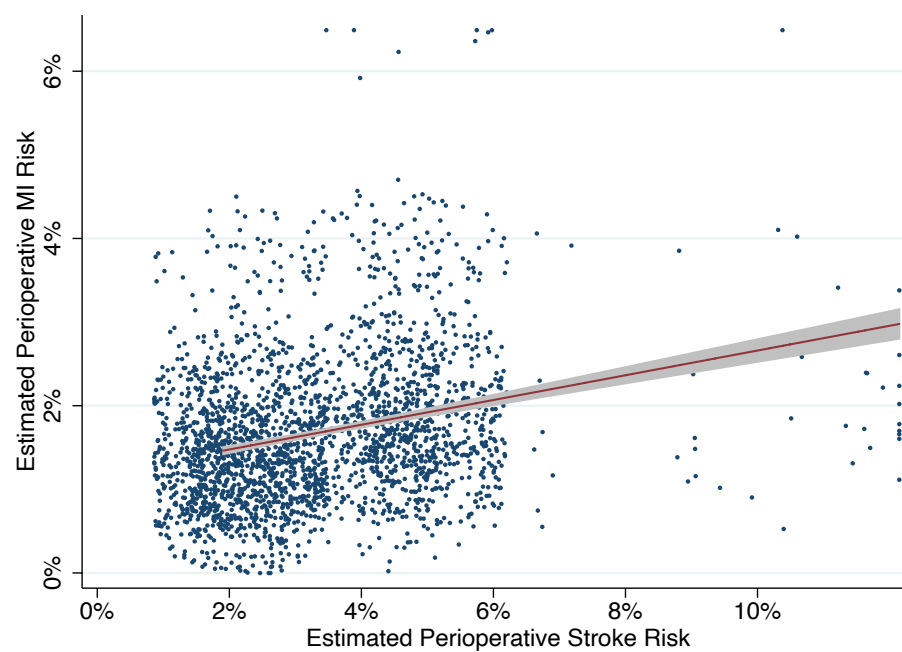

Supplement: svn-2020-000558supp001_data_supplement.pdf [file svn-2020-000558supp001_data_supplement.pdf]
